# Supplementary material for: A facile synthesis of a NiMoO4@metal-coated graphene-ink nanosheet structure towards the high energy density of a battery type-hybrid supercapacitor
Source: Royal Society of Chemistry journal article supplement (doi:10.1039/d0dt00624f), 2020-01-01

**Facile synthesis of NiMoO<sub>4</sub>@metal coated graphene-ink nanosheet structure towards high energy density of battery type-hybrid supercapacitor**

Venkata Thulasivarma Chebrolu, <sup>a</sup> Balamuralitharan Balakrishnan, <sup>b</sup> Aravindha Raja Selvaraj,

<sup>a</sup> Hee-Je Kim, <sup>a\*</sup>

Department of Electrical Engineering, Pusan National University, Gumjeong-Ku, Jangjeong-Dong, Busan 46241, Republic of Korea.

Department of Electronics and Communication Engineering, Vel Tech Rangarajan Dr. Sagunthala R&D Institute of Science and Technology, Chennai – 600062, Tamil Nadu, India.

†Electronic supplementary information (ESI) available:

\*Corresponding author. Tel: +82-10-2295-0613; fax: +82-51-5130212.

E-mail address: [heeje@pusan.ac.kr](mailto:heeje@pusan.ac.kr)

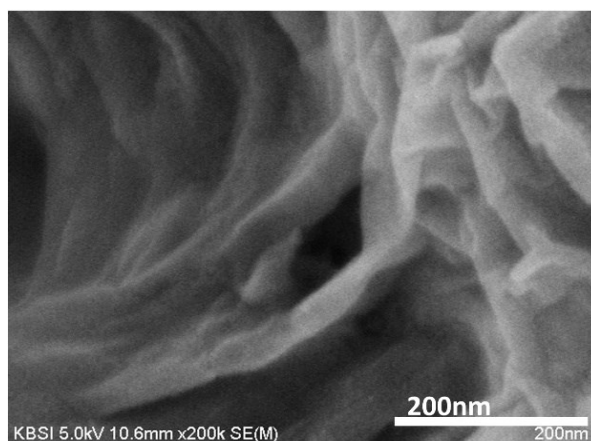

**Fig. S1.** FE-SEM image of NiMoO<sub>4</sub> nanosheet structure after 5000 cycles.

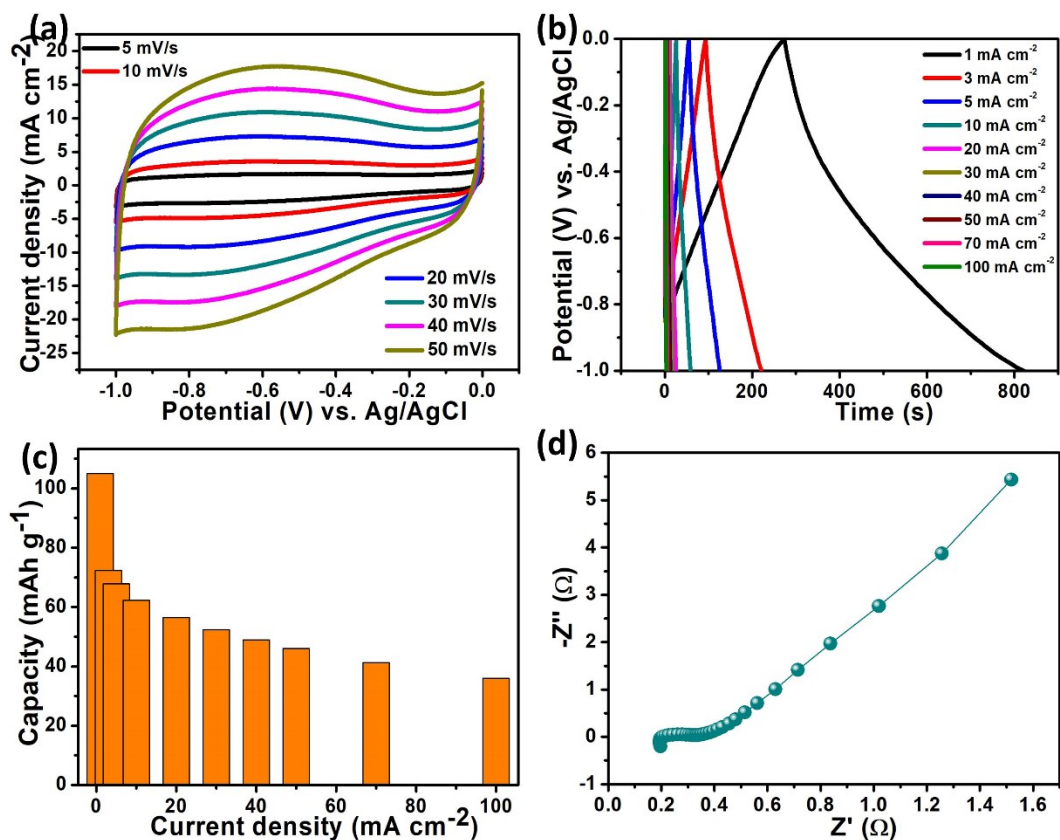

**Fig. S2.** (a-b) CV and GCD plots of MCG-ink in 3 M KOH electrolyte solution, (c-d) corresponding current density vs specific capacity of MCG-ink and EIS spectrum.

### Video. S1

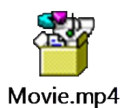

Supplement: d0dt00624f1.pdf [file d0dt00624f1.pdf]
